# Supplementary material for: One-step synthesis of boron and nitrogen-dual-self-doped graphene sheets as non-metal catalysts for oxygen reduction reaction
Source: Royal Society of Chemistry journal article supplement (doi:10.1039/c3ta13318d), 2013-01-01
Supplement: c3ta13318d.pdf [file c3ta13318d.pdf]

## Supporting Information

# One-step synthesis of boron and nitrogen-dual-self-doped graphene sheets as non-metal catalysts for oxygen reduction reaction

Jinliang Zhu, Chunyong He, Yunyong Li, Shuai Kang, Pei Kang Shen\*

State Key Laboratory of Optoelectronic Materials and Technologies, and Key Laboratory of Low-carbon Chemistry & Energy Conservation of Guangdong Province, School of Physics and Engineering, Sun Yat-sen University, 135 Xingang Road, Guangzhou, 510275, PR China.

### Additional data:

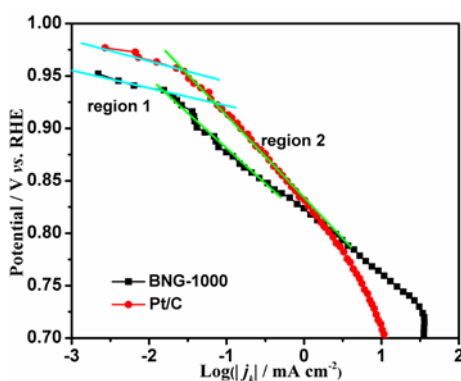

**Figure S1** The corrected Tafel plots for ORR on BNG-1000 and Pt/C.

The Tafel plots for ORR on BNG-1000 and Pt/C derive from the conversion of the measured oxygen reduction currents density in Figure 5a in the manuscript to the corresponding kinetic currents density according equation<sup>[S1-S3]</sup>:

$$j_k = \frac{j j_D}{j_D - j}$$

where  $j_k$  is the kinetic current density,  $j$  the measured current density and  $j_D$  the limiting current density. The Tafel slope of BNG-1000 and Pt/C in the region 2 is -70.1 and -81 mV/decade, respectively.

We also evaluated the ORR performance of BNG samples, Pt/C and carbon (Vulcan XC-72) in acid solution, and the results are shown in the Figure S2.

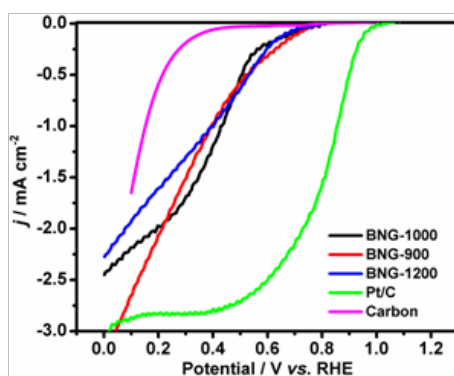

**Figure S2** Polarization curves for ORR on BNG samples, Pt/C and carbon (Vulcan XC-72) at 1600 rpm in oxygen-saturated 0.1 mol/L HClO<sub>4</sub> solution at 25 °C with a sweep rate of 5 mV/s.

## References

- [S1] J. Chlistunoff, *J. Phys. Chem. C* 2011, **115**, 6496.
- [S2] J. Jiang, A. Kucernak, *J Solid State Electr.* 2012, **16**, 2571.
- [S3] S. Wang, E. Iyyamperumal, A. Roy, Y. Xue, D. Yu, L. Dai, *Angew. Chem. Int. Edit.* 2011, **50**, 11756.
